# Supplementary material for: Computational screening of transition-metal doped boron nanotubes as efficient electrocatalysts for water splitting
Source: Royal Society of Chemistry journal article supplement (doi:10.1039/d1ra09381a), 2022-01-01
Supplement: d1ra09381a1.pdf [file d1ra09381a1.pdf]

## Supporting information

### **Computational screening of transition-metal doped boron nanotubes as efficient electrocatalysts for water splitting**

Jiajie Lu<sup>1</sup>, Xiuli Hou<sup>1,\*</sup>, Beibei Xiao<sup>2</sup>, Xuejian Xu<sup>1</sup>, Jianli Mi<sup>1</sup>, Peng Zhang<sup>1,3</sup>

<sup>1</sup>*Institute for Advanced Materials, School of Materials Science and Engineering,*

*Jiangsu University, Zhenjiang 212013, China*

<sup>2</sup>*School of Energy and Power Engineering, Jiangsu University of Science and Technology, Zhenjiang 212003, China*

<sup>3</sup>*Key Laboratory for Water Quality and Conservation of the Pearl River Delta,*

*Ministry of Education, Institute of Environmental Research at Greater Bay,*

*Guangzhou University, Guangzhou 510006, China*

*\*E-mail: houxiuli@ujs.edu.cn*

Table S1. The adsorption energies ( $E_{ad}$ ) of OOH on Rh-doped BNTs with different actual truncation radius (R).

| R/Å | $E_{ad}/e$<br>V |
|-----|-----------------|
| 4.6 | -1.752          |
| 4.8 | -1.759          |
| 5.0 | -1.761          |
| 5.2 | -1.756          |
| 5.4 | -1.758          |

Table S2. The adsorption energies ( $E_{ad}$ ) of OOH on Rh-doped BNTs with different energy convergence.

| energy convergence<br>tolerance/Ha | $E_{ad}/e$<br>V |
|------------------------------------|-----------------|
| $2.0 \times 10^{-5}$               | -1.753          |
| $1.0 \times 10^{-5}$               | -1.756          |
| $5.0 \times 10^{-6}$               | -1.753          |
| $1.0 \times 10^{-6}$               | -1.753          |

Table S3. The calculated free energy corrections: total energy ( $E$ ), zero-point energy ( $ZPE$ ), entropy ( $S$ ), and heat capacity ( $C_p$ ).  $T$  is temperature and equals 298.15. All results are in unit of eV.

|    |               | OOH          | O            | OH           | H            |
|----|---------------|--------------|--------------|--------------|--------------|
| Cr | $ZPE$         | 5.293506702  | 5.004571286  | 5.265493453  | 5.183014816  |
|    | $TS$          | 1.617317608  | 1.265156822  | 1.430881066  | 1.185656247  |
|    | $E$           | -61224.70686 | -59158.63813 | -59174.94896 | -57121.88001 |
|    | $\int C_p dT$ | 0.862339739  | 0.768933333  | 0.818108293  | 0.734545552  |
| Mn | $ZPE$         | 5.316619801  | 4.985360962  | 5.26098358   | 5.140908214  |
|    | $TS$          | 1.41133238   | 1.30178475   | 1.312541699  | 1.202619128  |
|    | $E$           | -64073.45415 | -62007.61707 | -62024.11431 | -59971.44081 |
|    | $\int C_p dT$ | 0.823398721  | 0.779861102  | 0.791569426  | 0.738838604  |
| Co | $ZPE$         | 5.337304507  | 4.974173008  | 5.243854736  | 5.082583415  |
|    | $TS$          | 1.45575651   | 1.319600947  | 1.334365894  | 1.260592877  |
|    | $E$           | -70359.7429  | -68292.94172 | -68310.3351  | -66257.73077 |
|    | $\int C_p dT$ | 0.837492074  | 0.788707391  | 0.80119627   | 0.760217136  |
| Ni | $ZPE$         | 5.451872624  | 5.076989438  | 5.345456969  | 5.086529554  |
|    | $TS$          | 1.408669001  | 1.279327034  | 1.284602076  | 1.214591405  |
|    | $E$           | -73789.82846 | -71722.59598 | -71740.52904 | -69687.98182 |
|    | $\int C_p dT$ | 0.826607669  | 0.771491818  | 0.774614038  | 0.750633656  |
| Mo | $ZPE$         | 5.308987708  | 5.05929686   | 5.323427975  | 5.052575414  |
|    | $TS$          | 1.417628815  | 1.296703644  | 1.46306141   | 1.270367219  |
|    | $E$           | -143306.0084 | -141239.85   | -141255.8074 | -139202.371  |
|    | $\int C_p dT$ | 0.835800871  | 0.780121287  | 0.811473576  | 0.770277622  |
| Ru | $ZPE$         | 5.428239156  | 5.037137773  | 5.319785385  | 5.015325599  |
|    | $TS$          | 1.445658942  | 1.367257334  | 1.349350634  | 1.283141096  |
|    | $E$           | -156852.9609 | -154786.6387 | -154803.654  | -152750.7681 |
|    | $\int C_p dT$ | 0.832505195  | 0.786322362  | 0.79963516   | 0.767025309  |
| Rh | $ZPE$         | 5.403608311  | 5.062072166  | 5.319048194  | 5.039436073  |
|    | $TS$          | 1.430531982  | 1.296768289  | 1.352207948  | 1.278111706  |
|    | $E$           | -164072.2031 | -162005.4275 | -162022.9822 | -159970.5737 |
|    | $\int C_p dT$ | 0.836668155  | 0.762472072  | 0.802193645  | 0.772575922  |
| Pd | $ZPE$         | 5.328805131  | 4.95335821   | 5.201748134  | 5.008951067  |
|    | $TS$          | 1.620136136  | 1.40085987   | 1.452382035  | 1.377096322  |
|    | $E$           | -171819.6199 | -169752.2532 | -169770.3234 | -167717.9861 |
|    | $\int C_p dT$ | 0.86901782   | 0.790398593  | 0.8029742    | 0.764900465  |
| W  | $ZPE$         | 5.28015054   | 5.007303229  | 5.337477963  | 5.082540051  |
|    | $TS$          | 1.487923925  | 1.407725182  | 1.473986436  | 1.260308438  |
|    | $E$           | -465835.9737 | -463769.8431 | -463785.3431 | -461731.9791 |
|    | $\int C_p dT$ | 0.840310744  | 0.790355229  | 0.816677276  | 0.766331483  |

|    |               |              |              |              |              |
|----|---------------|--------------|--------------|--------------|--------------|
| Os | <i>ZPE</i>    | 5.244678655  | 4.973696003  | 5.164585047  | 5.054309981  |
|    | <i>TS</i>     | 1.548043892  | 1.31678242   | 1.423498593  | 1.394602222  |
|    | <i>E</i>      | -426011.7737 | -423945.735  | -423961.8052 | -421909.1313 |
|    | $\int C_p dT$ | 0.86485486   | 0.793477449  | 0.834109669  | 0.792306616  |
| Ir | <i>ZPE</i>    | 5.259335742  | 4.921008545  | 5.190950458  | 5.013894581  |
|    | <i>TS</i>     | 1.539743458  | 1.386780162  | 1.292618072  | 1.304344697  |
|    | <i>E</i>      | -454751.2832 | -452685.1408 | -452702.3489 | -450649.7351 |
|    | $\int C_p dT$ | 0.869841739  | 0.805489322  | 0.784457703  | 0.782159402  |
| Pt | <i>ZPE</i>    | 5.278155789  | 5.002489807  | 5.333878738  | 5.045810605  |
|    | <i>TS</i>     | 1.473314127  | 1.483553914  | 1.364167297  | 1.295863257  |
|    | <i>E</i>      | -440697.3276 | -438630.8744 | -438648.1334 | -436595.6972 |
|    | $\int C_p dT$ | 0.851325242  | 0.814335611  | 0.799765252  | 0.775481321  |

Table S4. The calculated free energy corrections: total energy (*E*), zero-point energy (*ZPE*), entropy (*S*), and heat capacity (*C<sub>p</sub>*) for gas phase H<sub>2</sub> and H<sub>2</sub>O. *T* is temperature and equals 298.15. All results are in unit of eV.

|               | H <sub>2</sub> | H <sub>2</sub> O |
|---------------|----------------|------------------|
| <i>ZPE</i>    | 0.319116873    | 0.566249236      |
| <i>TS</i>     | 0.024513432    | 0.040222197      |
| <i>E</i>      | -31.88072753   | -2084.655378     |
| $\int C_p dT$ | 0.005160335    | 0.051950267      |

Table S5. Adsorption energies ( $E_{ad}$ ) of free metal atoms on pristine BNTs. All results

are in unit of eV.

|              | Cr    | Mn    | Co    | Ni    | Mo    | Ru    |
|--------------|-------|-------|-------|-------|-------|-------|
| $E_a$        | -2.67 | -2.80 | -4.13 | -4.03 | -4.23 | -5.40 |
| <sub>d</sub> |       |       |       |       |       |       |
|              | Rh    | Pd    | W     | Os    | Ir    | Pt    |
| $E_a$        | -4.42 | -2.84 | -6.56 | -6.01 | -5.58 | -4.36 |
| <sub>d</sub> |       |       |       |       |       |       |

Table S6. Adsorption energies ( $E_{ad}$ ) of metal atoms on pristine BNTs respect to bulk

metal. All results are in unit of eV.

|              | Cr   | Mn   | Co   | Ni   | Mo   | Ru   |
|--------------|------|------|------|------|------|------|
| $E_a$        | 2.21 | 0.96 | 0.69 | 0.57 | 2.50 | 1.71 |
| <sub>d</sub> |      |      |      |      |      |      |
|              | Rh   | Pd   | W    | Os   | Ir   | Pt   |
| $E_a$        | 1.06 | 0.88 | 3.52 | 2.78 | 1.90 | 1.75 |
| <sub>d</sub> |      |      |      |      |      |      |

Table S7. Adsorption energies of the reaction intermediates on different TM-doped

BNTs. All results are in unit of eV.

|     | Cr    | Mn    | Co    | Ni    | Mo    | Ru    |
|-----|-------|-------|-------|-------|-------|-------|
| OOH | -3.69 | -3.01 | -2.03 | -1.83 | -3.87 | -2.33 |
| O   | -6.86 | -6.41 | -4.47 | -3.83 | -6.94 | -5.24 |
| OH  | -4.53 | -4.26 | -3.22 | -3.12 | -4.26 | -3.62 |
| H   | -2.51 | -2.94 | -1.28 | -0.93 | -2.89 | -1.70 |
|     | Rh    | Pd    | W     | Os    | Ir    | Pt    |
| OOH | -1.76 | -1.43 | -4.93 | -3.43 | -2.12 | -2.55 |
| O   | -4.21 | -3.30 | -8.03 | -6.62 | -5.21 | -5.33 |
| OH  | -3.13 | -2.73 | -4.90 | -4.06 | -3.78 | -3.95 |
| H   | -1.05 | -0.59 | -2.57 | -2.14 | -1.27 | -1.42 |

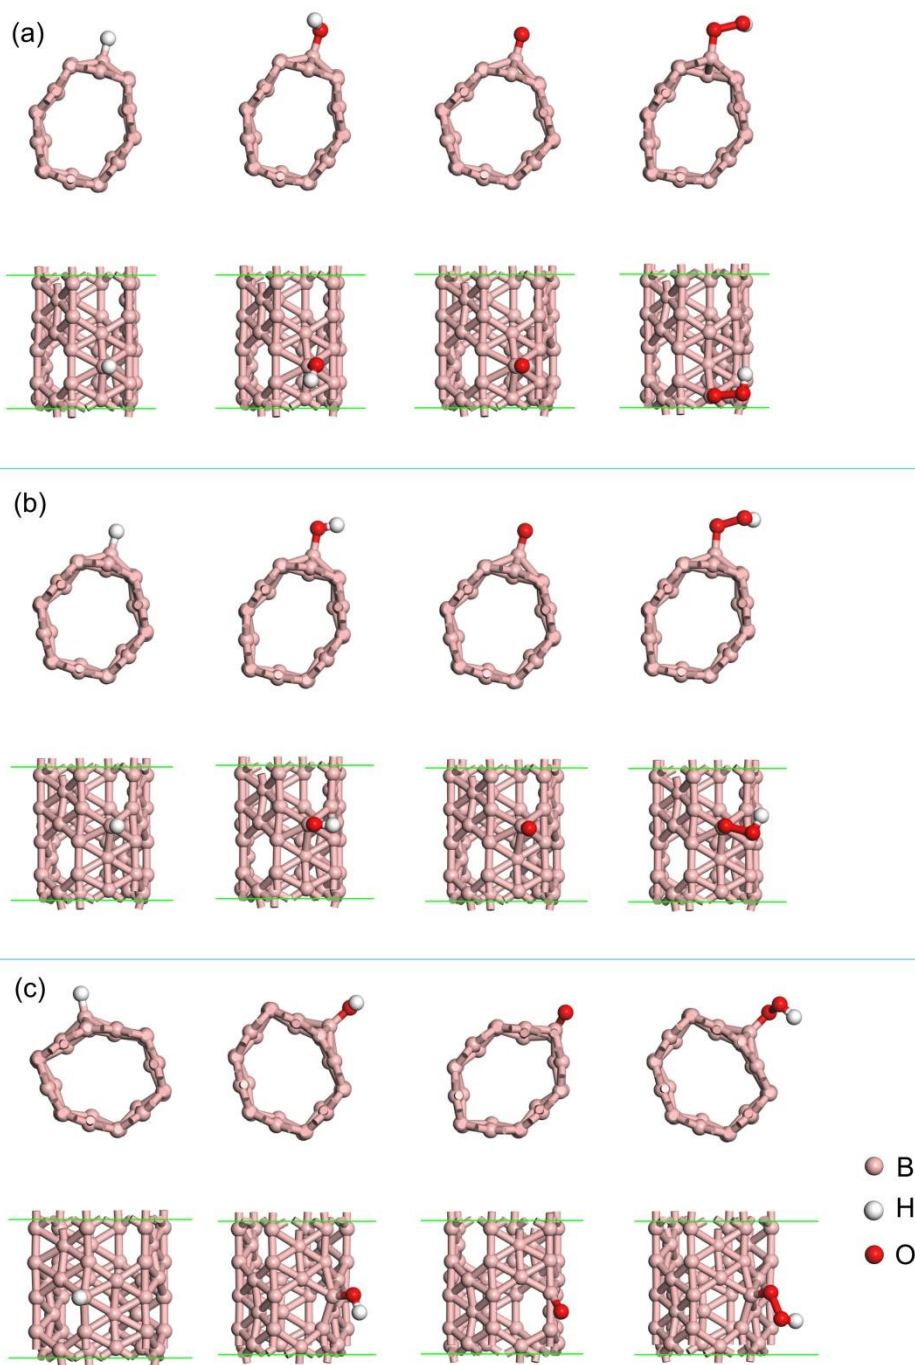

Fig. S1 Atomic structures of reaction intermediates (H, OH, O, OOH, and O<sub>2</sub>) on pristine BNTs with three different adsorption sites.

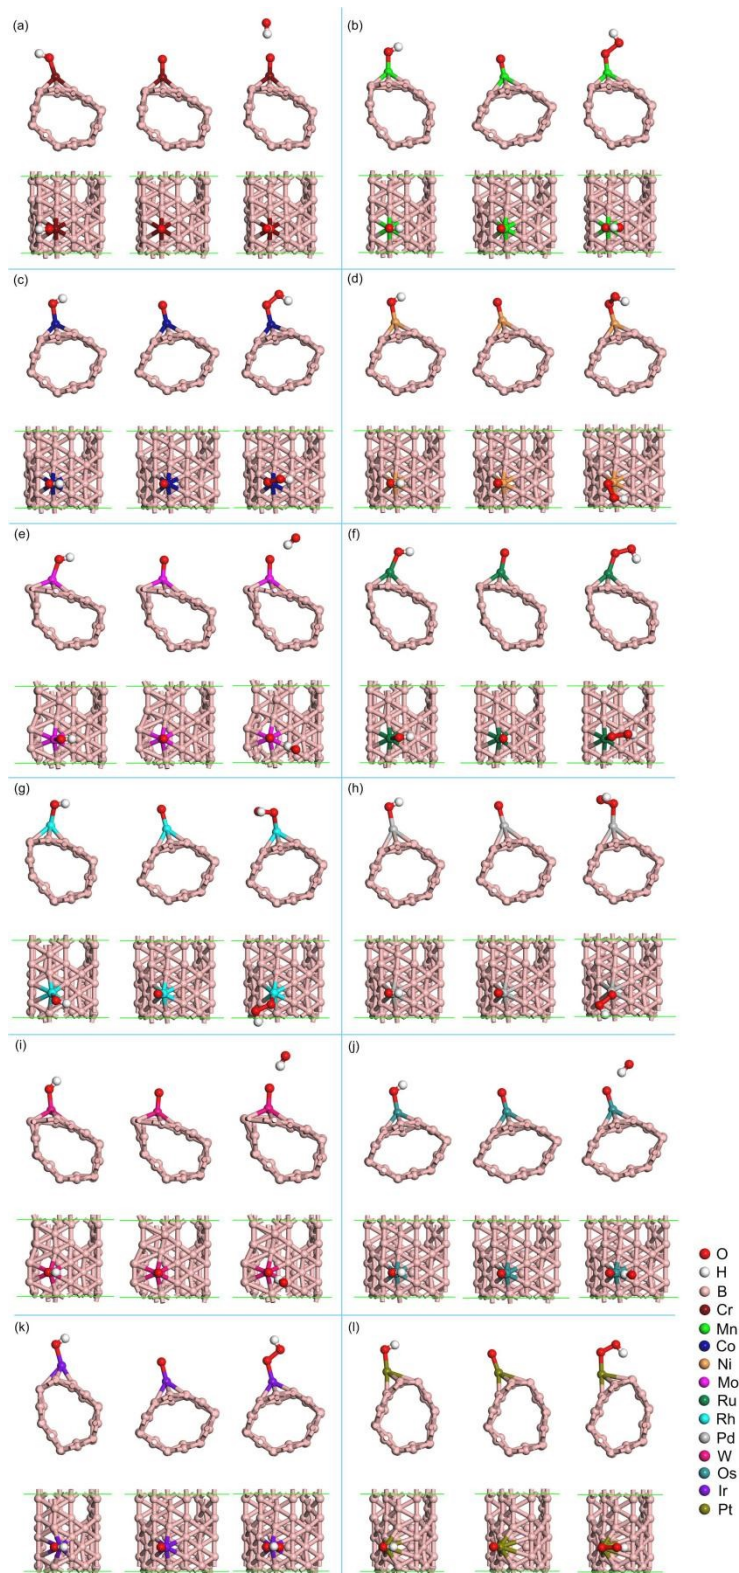

Fig. S2 Atomic structures of reaction intermediates (OH, O, OOH, and O<sub>2</sub>) for OER on TM-doped BNTs. (a) Cr, (b) Mn, (c) Co, (d) Ni, (e) Mo, (f) Ru, (g) Rh, (h) Pd, (i) W, (j) Os, (k) Ir, (l) Pt.

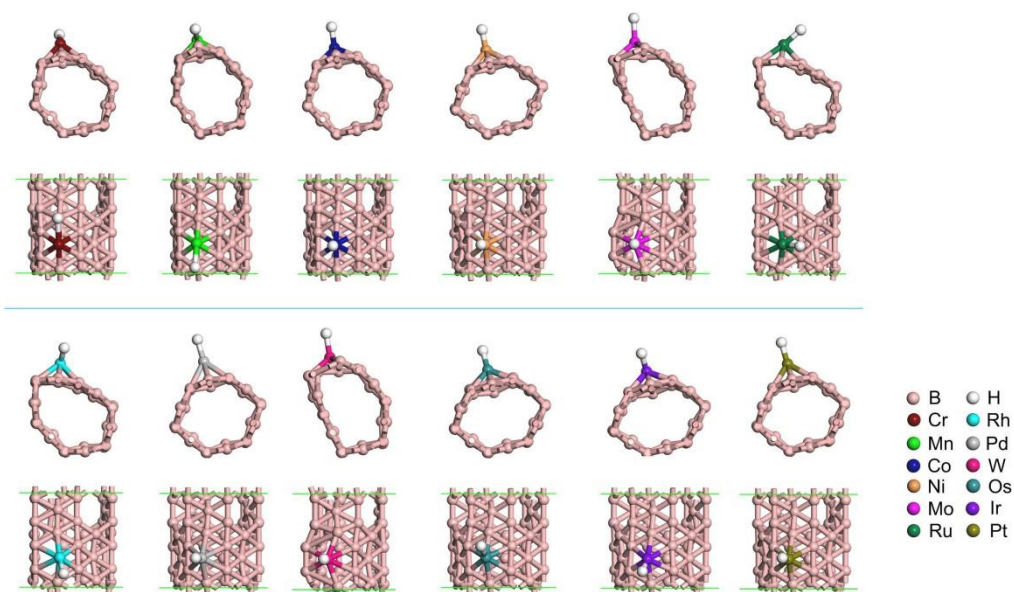

Fig. S3 Atomic structures of H adsorbed on TM-doped BNTs.

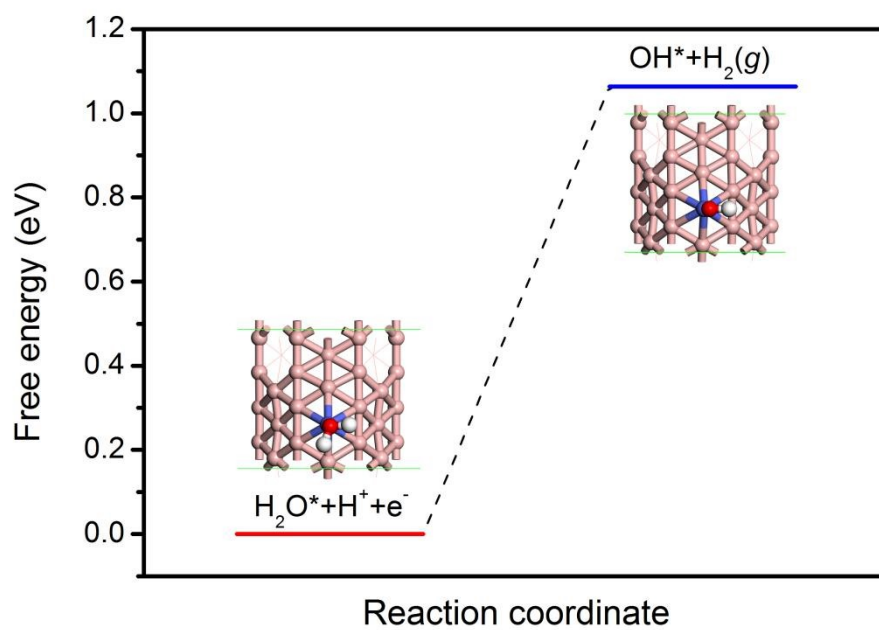

Fig. S4 Free energy profile for HER on Co-doped BNTs via  $\text{H}_2\text{O}$ .



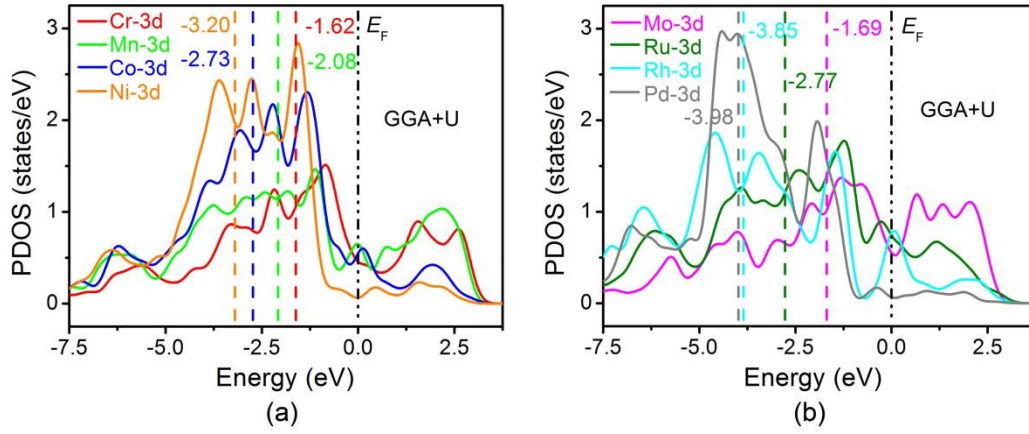

Fig. S5 The partial density of states (PDOS) of the transition metal doped BNTs with GGA+U approach. The U values for Cr, Mn, Co, Ni, Mo, Ru, Rh, and Pd were set as

2.5, 2.5, 2.5, 2.5, 2.0, 2.0, 2.0, 2.0 eV, respectively.
